# Supplementary material
Source: PubMed Central journal article supplement (PMC1317988)

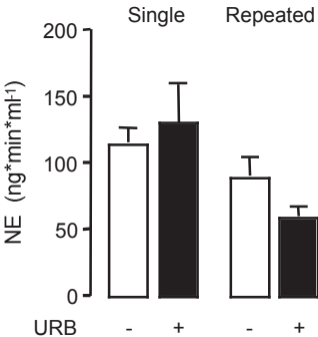

Supplement: pnas_0509591102_1.pdf [file pnas_0509591102_1.pdf]
